# Supplementary material for: Calculation of the relative metastabilities of proteins using the CHNOSZ software package
Source: PubMed Central journal article supplement (PMC2654789; doi:10.1186/1467-4866-9-10), 2008-10-03
Supplement: 1467-4866-9-10-S2.pdf [file 1467-4866-9-10-S2.pdf]

Additional File 2

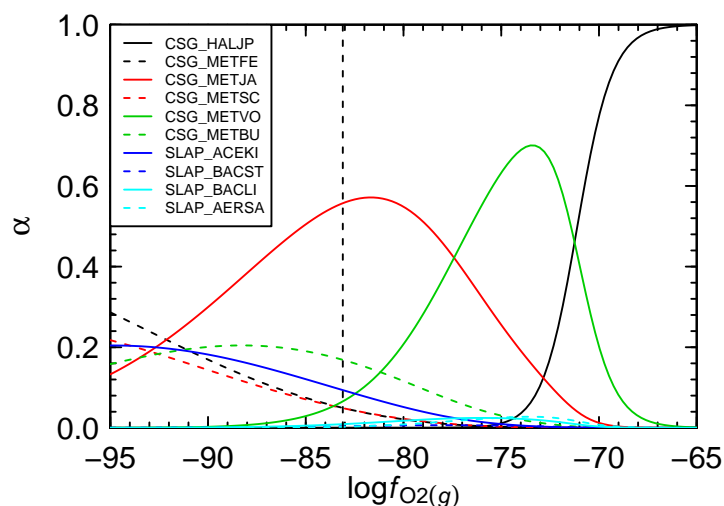

Calculated degrees of formation of ten surface-layer proteins as a function of  $\log f_{O_2(g)}$  at 25 °C and 1 bar (see text for activities of basis species used). The vertical dashed line denotes the lower (reducing) stability limit of H<sub>2</sub>O. The figure was created in CHNOSZ using the following commands:

```
# open plot file
thermo.postscript("alpha.ps")
# set sizes, margins, background color
par(cex=2,lwd=2,mar=c(3,3,1,1),bg="white")
# define basis species
basis("CHNOS+")
# load proteins
species(c("CSG_HALJP","CSG_METFE","CSG_METJA",
          "CSG_METSC","CSG_METVO","CSG_METBU",
          "SLAP_ACEKI","SLAP_BACST","SLAP_BACLI","SLAP_AERSA"))
# calculate affinities of formation reactions
a <- affinity(O2=c(-95,-65))
# plot metastability diagram with options for line
# type, color, and legend
diagram(a, residue=TRUE, alpha=TRUE, lty=rep(c(1,2),5),
        color=rep(palette()[1:5], each=2),
        legend.x="topleft", cex.names=0.5)
# plot water line
s <- subcrt(c("H2O","O2","H2"),c(-1,0.5,1),T=25)
abline(v=2*s$out$logK, lty=2)
# close plot file
dev.off()
```
